# Supplementary material
Source: PubMed Central journal article supplement (PMC8530855)

## SUPPLEMENTAL TABLES/FIGURES

Supplementary Table 1.

| Participant | Medication              | Dosage    | Frequency             |
|-------------|-------------------------|-----------|-----------------------|
| PD 1        | Acetaminophen           | 625 mg    | PRN                   |
|             | Carbidopa/levodopa      | 25/100 mg | Every 3 hrs           |
|             | Clonazepam              | 0.5 mg    | QHS                   |
|             | Lorazepam               | 0.5 mg    | 1-2 times PRN per day |
|             | Raloxifene              | 60 mg     | QD                    |
|             | Rotigotine              | 6 mg      | QD                    |
|             | Selegiline              | 5 mg      | QD                    |
|             | Tramadol                | 50 mg     | TID                   |
| PD 2        | Amlodipine              | 5 mg      | PRN                   |
|             | Aspirin                 | 81 mg     | QD                    |
|             | Carbidopa               | 25 mg     | TID                   |
|             | Carbidopa/levodopa      | 25/100 mg | TID                   |
|             | Clonidine               | 0.1 mg    | PRN                   |
|             | Cranberry supplement    |           | QD                    |
|             | Fiber supplement        |           | QD                    |
|             | Glucosamine Chondroitin |           | QD                    |
|             | Midodrine               | 2.5 mg    | PRN                   |
| Rasagiline  | 1 mg                    | QD        |                       |
| PD 3        | Amantadine              | 100 mg    | BID                   |
|             | Carbidopa/levodopa      | 25/100 mg | QID                   |
|             | Melatonin               | 3 mg      | QHS                   |
|             | Multivitamin            |           | QD                    |
|             | Pramipexole             | 1 mg      | TID                   |
|             | Selegiline              | 5 mg      | BID                   |
|             | Vitamin D               | 2000 IU   | QD                    |
| PD 4        | Ativan                  | 0.5 mg    | PRN                   |
|             | Carbidopa/levodopa      | 25/100 mg | 5 QD                  |
|             | Gabapentin              | 300 mg    | TID                   |
|             | Pramipexole             | 1 mg      | QID                   |
|             | Selegiline              | 5 mg      | QD                    |
| PD 5        | Amantadine              | 100 mg    | TID                   |
|             | Carbidopa/levodopa      | 25/100 mg | 1H QD                 |
|             | Entacapone              | 200 mg    | 6 QD                  |
|             | Ropinirole              | 4 mg      | BID                   |

| Participant | Medication           | Dosage       | Frequency       |
|-------------|----------------------|--------------|-----------------|
| PD 6        | Acetaminophen        | 1000 mg      | QHS             |
|             | Amantadine           | 100 mg       | BID             |
|             | Caltrate + vitamin D | 600 mg       | QHS             |
|             | Carbidopa/levodopa   | 36.25/145 mg | TID             |
|             | Carbidopa/levodopa   | 48.75/195 mg | QID             |
|             | Co-Q10               | 100 mg       | QD              |
|             | Furosemide           | 20 mg        | QD              |
|             | Glucosamine          | 1500 mg      | QD              |
|             | Multivitamin         |              | QD              |
|             | Oxycodone HCL        | 5 mg         | PRN             |
|             | Ropinirole           | 12 mg        | QHS             |
|             | Selegiline           | 1.25 mg      | QHS             |
|             | Simvastatin          | 10 mg        | QHS             |
|             | Venlafaxine          | 150 mg       | QD              |
| PD 7        | Carbidopa/levodopa   | 23.75/95 mg  | 5 times per day |
|             | Ferrous gluconate    | 324 mg       | QD              |
|             | Folic acid           | 1 mg         | QD              |
|             | Pramipexole          | 0.125 mg     | 5 times per day |
|             | Selegiline           | 5 mg         | BID             |
|             | Vitamin B12          | 1 injection  | Monthly         |
|             | Vitamin B2           | 100 mg       | QD              |
| PD 8        | Allopurinol          | 300 mg       | QD              |
|             | Amantadine           | 100 mg       | TID             |
|             | Amlodipine           | 5 mg         | BID             |
|             | Aspirin              | 325 mg       | QD              |
|             | Azithromycin         | 500 mg       | QD              |
|             | Calcitriol           | 0.25 mcg     | QD              |
|             | Colchicine           | 0.6 mg       | QD              |
|             | Co-Q10               | 200 mg       | QD              |
|             | Folic acid           | 0.4 mg       | QD              |
|             | Multivitamin         |              | QD              |
|             | Niacin               | 500 mg       | QD              |
|             | Omega 3 fatty acid   | 3000 mg      | QD              |
|             | Rasagiline           | 1 mg         | QD              |
|             | Sildenafil           | 100 mg       | PRN             |
|             | Telmisartan          | 40 mg        | QD              |
|             | Testosterone         | 1%           | QD topically    |
|             | Vitamin B12          | 500 mcg      | BID             |
| Vitamin E   | 1000 IU              | QD           |                 |
| PD 9        | Amantadine           | 100 mg       | BID             |
|             | Carbidopa/levodopa   | 25/100 mg    | QID             |
|             | Cephalexin           | 500 mg       | PRN             |
|             | Co-Q10               | 100 mg       | QD              |
|             | Pramipexole          | 0.375 mg     | QD              |

| Participant | Medication            | Dosage          | Frequency |
|-------------|-----------------------|-----------------|-----------|
| PD 9        | Selegiline            | 5 mg            | BID       |
|             | Vitamin D3            | 1000 IU         | BID       |
| PD 10       | Data unavailable      |                 |           |
| Control 1   | Warfarin              | 5 mg            | QD        |
| Control 2   | Amiloride HCL         | 5 mg            | QD        |
|             | Amlodipine            | 10 mg           | QD        |
|             | Aspirin               | 81 mg           | QD        |
|             | Enalapril maleate     | 20 mg           | BID       |
|             | Ezetimibe/Simvastatin | 10-20 mg        | QD        |
|             | Fexofenadine HCL      | 180 mg          | PRN       |
|             | Furosemide            | 40 mg           | QD        |
|             | Glipizide             | 10 mg           | QD        |
|             | Hydralazine           | 100 mg          | BID       |
|             | Indomethacin          | 10              | PRN       |
|             | Metoprolol            | 50 mg           | QD        |
| Tamsulosin  | 0.4 mg                | QD              |           |
| Control 3   | Acetaminophen         | 500 mg          | QID       |
|             | Apixaban              | 5 mg            | BID       |
|             | Aspirin               | 81 mg           | QD        |
|             | Diltiazem             | 120 mg          | QD        |
|             | Fiber supplement      |                 | QD        |
|             | Fish oil supplement   | 1200 mg         | QD        |
|             | Levothyroxine         | 100 µg          | QD        |
|             | Red yeast rice        | 600 mg          | BID       |
| Control 4   | Aspirin               | 81 mg           | QD        |
|             | Fish oil supplement   | 1000 mg         | QD        |
|             | Lisinopril            | 20 mg           | QD        |
|             | Melatonin             |                 | QD        |
|             | Multivitamin          |                 | QD        |
|             | Omeprazole            | 20 mg           | QD        |
|             | Simvastatin           | 20 mg           | QD        |
|             | Testosterone          | 30 mg           | QD        |
|             | Vitamin C             | 1000 mg         | QD        |
|             | Vitamin D3            | 200 µg          | QD        |
| Control 5   | Aspirin               | 81 mg           | BID       |
|             | Atorvastatin          | 10 mg           | QD        |
|             | Cetirizine            |                 | PRN       |
|             | Cyclosporine          | 1 drop each eye | BID       |
|             | Fish oil supplement   | 1200 mg         | QD        |
|             | Glucosamine           | 1500 mg         | BID       |
|             | Multivitamin          |                 | QD        |
|             | Sildenafil            | 100 mg          | PRN       |
|             | Travoprost            | 1 drop each eye | QD        |

| <b>Participant</b> | <b>Medication</b>       | <b>Dosage</b>   | <b>Frequency</b>      |
|--------------------|-------------------------|-----------------|-----------------------|
| Control 6          | Acetaminophen           |                 | PRN                   |
|                    | Aspirin                 | 81 mg           | QD                    |
|                    | Budesonide / Formoterol | 160-45 mg       | 1 puff BID            |
|                    | Fast acting lactase     |                 | 1-3 times per wk. PRN |
|                    | Iron                    | 325 (65 Fe) mg  | BID                   |
|                    | Lecithin                | 1200 mg         | QHS                   |
|                    | Multivitamin            |                 | QD                    |
|                    | Pantoprazole sodium     | 40 mg           | BID                   |
|                    | Probiotic               |                 | BID                   |
|                    | Refresh eye drops       |                 | 1-2 times daily       |
|                    | Simvastatin             | 40 mg           | QHS                   |
|                    | Super B complex         |                 | BID                   |
|                    | Vitamin B12             | 1000 mcg        | BID                   |
|                    | Vitamin C               | 1000 mg         | BID                   |
|                    | Vitamin D3              | 200 IU          | BID                   |
| Control 7          | Atorvastatin            | 20 mg           | QD                    |
|                    | Dicyclomine             | 10 mg           | QD                    |
|                    | Diltiazem               | 120 mg          | QD                    |
|                    | Ferrous sulfate         | 5 mg            | QD                    |
|                    | Glipizide               | 10 mg           | QD                    |
|                    | Hydrochlorothiazide     | 25 mg           | QD                    |
|                    | Levothyroxine sodium    | 50 mcg          | BID                   |
|                    | Losartan potassium      | 25 mg           | QD                    |
|                    | Metformin HCL           | 850 mg          | TID                   |
|                    | Metoprolol              | 25 mg           | BID                   |
|                    | Multivitamin            |                 | BID                   |
|                    | Ocular essentials       | 1 drop each eye | QD                    |
|                    | Omeprazole              | 20 mg           | QD                    |
|                    | Oxybutynin              | 5 mg            | QD                    |
|                    | Sitagliptin             | 100 mg          | QD                    |
|                    | Ubiquinol QH            | 100 mg          | QD                    |
|                    | Vitamin B12             | 1000 mcg        | QD                    |
| Vitamin D3         | 1000 mcg                | QD              |                       |
| Warfarin           | 8 mg                    | QD              |                       |
| Control 8          | None                    |                 |                       |
| Control 9          | Data unavailable        |                 |                       |
| Control 10         | Data unavailable        |                 |                       |
| Control 11         | Data unavailable        |                 |                       |

Supplemental Figure 1.

Comparison of Choroid between eyes ipsi-/contralateral to side of onset in PD

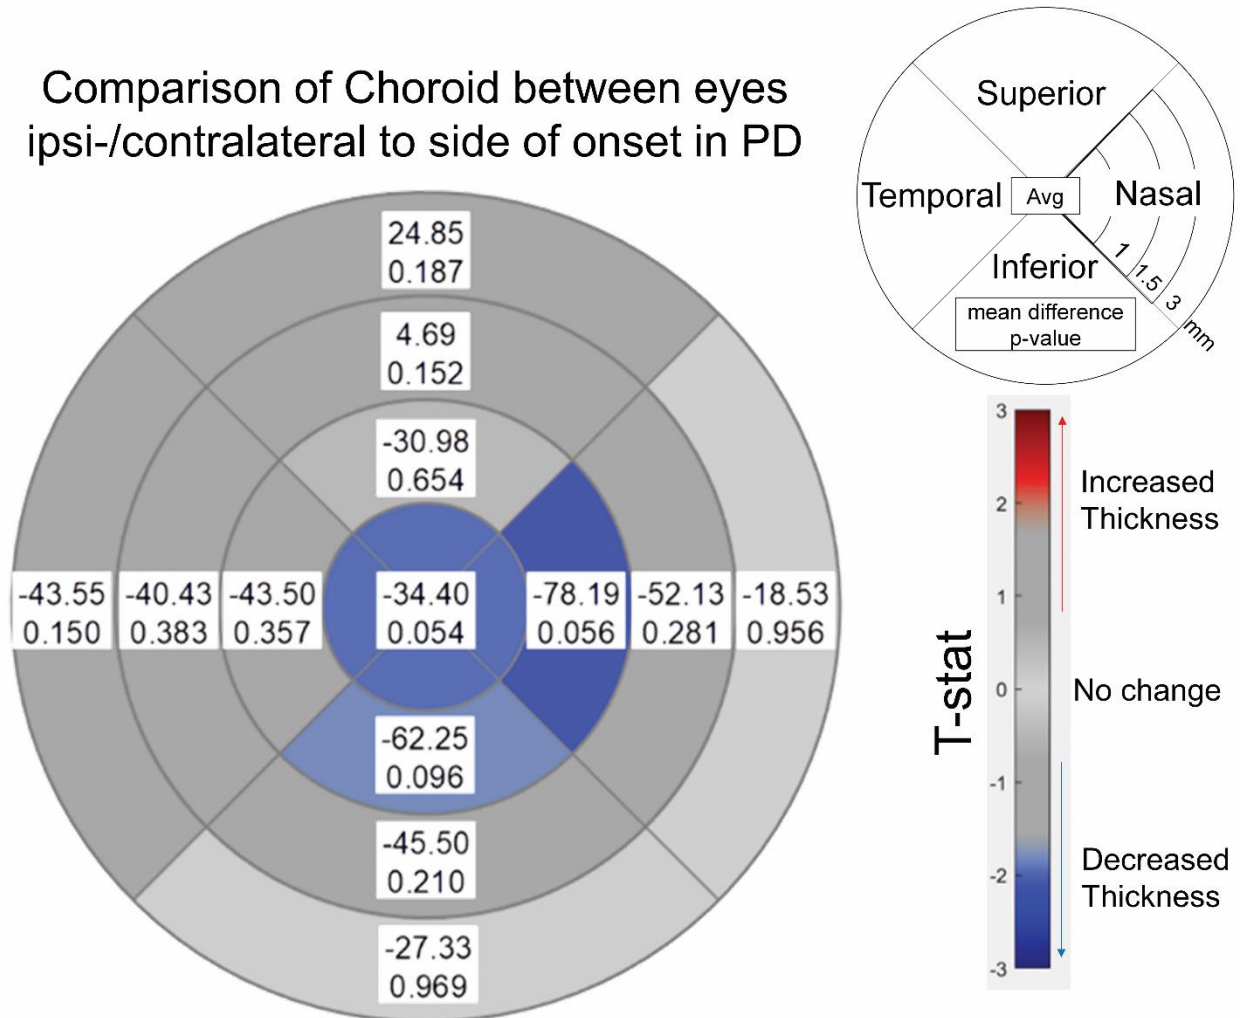

Supplement: NIHMS1719917-supplement-1.pdf [file NIHMS1719917-supplement-1.pdf]
